# Supplementary material for: Plant Roots Release Small Extracellular Vesicles with Antifungal Activity
Source: MDPI journal article supplement (doi:10.3390/plants9121777), 2020-12-15
Supplement: s1 [file s1]

**Plant roots release small extracellular vesicles with antifungal activity**

Monica De Palma, Alfredo Ambrosone, Antonietta Leone, Pasquale Del Gaudio, Michelina Ruocco, Lilla Turiák, Ramesh Bokka, Immacolata Fiume, Marina Tucci and Gabriella Pocsfalvi

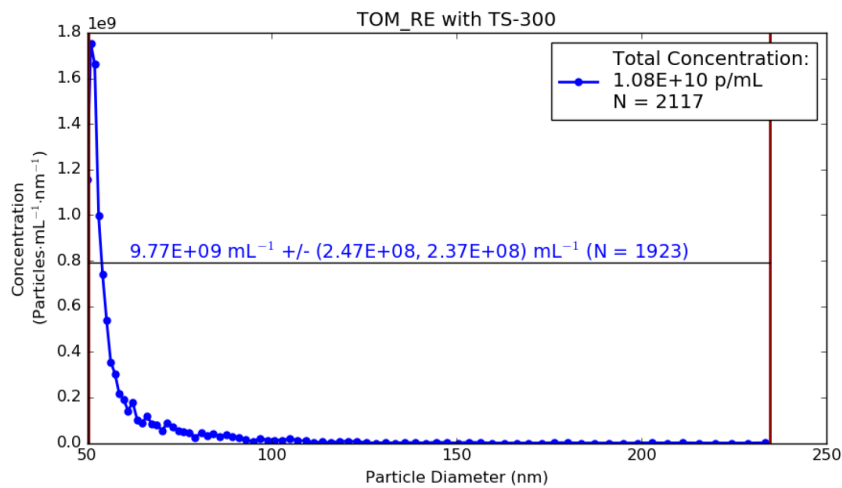

| Sample | Peak Diameter | Measured Size Range | Stock Concentration (particles/mL) | Dil. factor |
|--------|---------------|---------------------|------------------------------------|-------------|
| TOM_RE | 51 nm         | 50 – 300 nm         | 1.08 x 10 <sup>10</sup>            | 100x        |

**Figure S1. Particle size distribution and concentration of EVs released by tomato roots.** Particle size distribution and concentration of EVs released by tomato roots. Microfluidic resistive pulse sensing (MRPS) analysis was performed by nCS1 (Spectradyme) using a TS-300 single-use disposable cartridges that allows for particle size analysis in the range from 50 to 300 nm in diameter. Sample from one representative experiment, containing 0.18  $\mu\text{g } \mu\text{l}^{-1}$  proteins, as measured by BCA assay, was diluted hundred times in a buffer containing PBS 1% (v/v) Tween 20. Three microliters from the sample were processed for MRPS Spectradyme measurements using a TS300 cartridge. “Total stock concentration” ( $1.08 \times 10^{10}$  p/mL) was calculated based on the integration of the distribution peak observed in the stock solution (0.18  $\mu\text{g } \mu\text{l}^{-1}$ ). Based on this measurement, the ratio of particles to protein is  $6 \times 10^{10}$  EVs/ $\mu\text{g}$ . Line in the middle shows the values observed at full width at half maximum (FWHM). N is the number of particles counted.

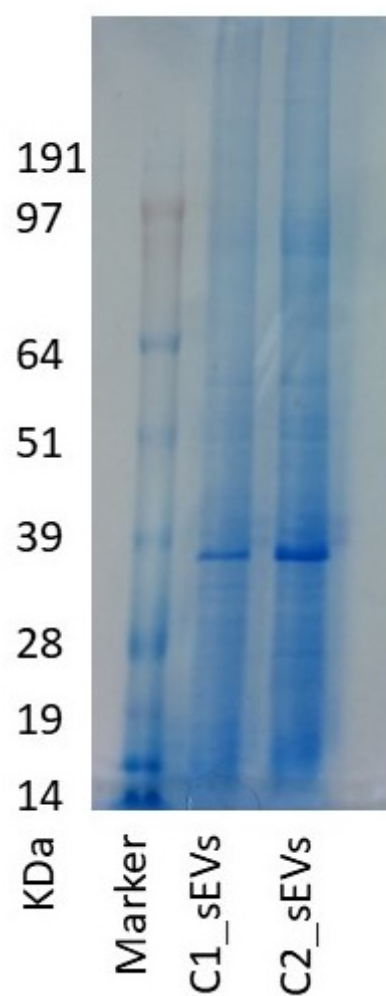

**Figure S2. SDS-PAGE analysis of EVs samples released by tomato roots.** The gel image shows similarities between the protein profiles of two biological replicates from one representative experiment.
